# Supplementary material for: DDX3 as a strongest prognosis marker and its downregulation promotes metastasis in colorectal cancer
Source: PubMed Central journal article supplement (PMC4621913; doi:10.18632/oncotarget.4329), 2015-06-02
Supplement: oncotarget-06-18602-s001.pdf [file oncotarget-06-18602-s001.pdf]

# DDX3 as a strongest prognosis marker and its downregulation promotes metastasis in colorectal cancer

Supplementary Material

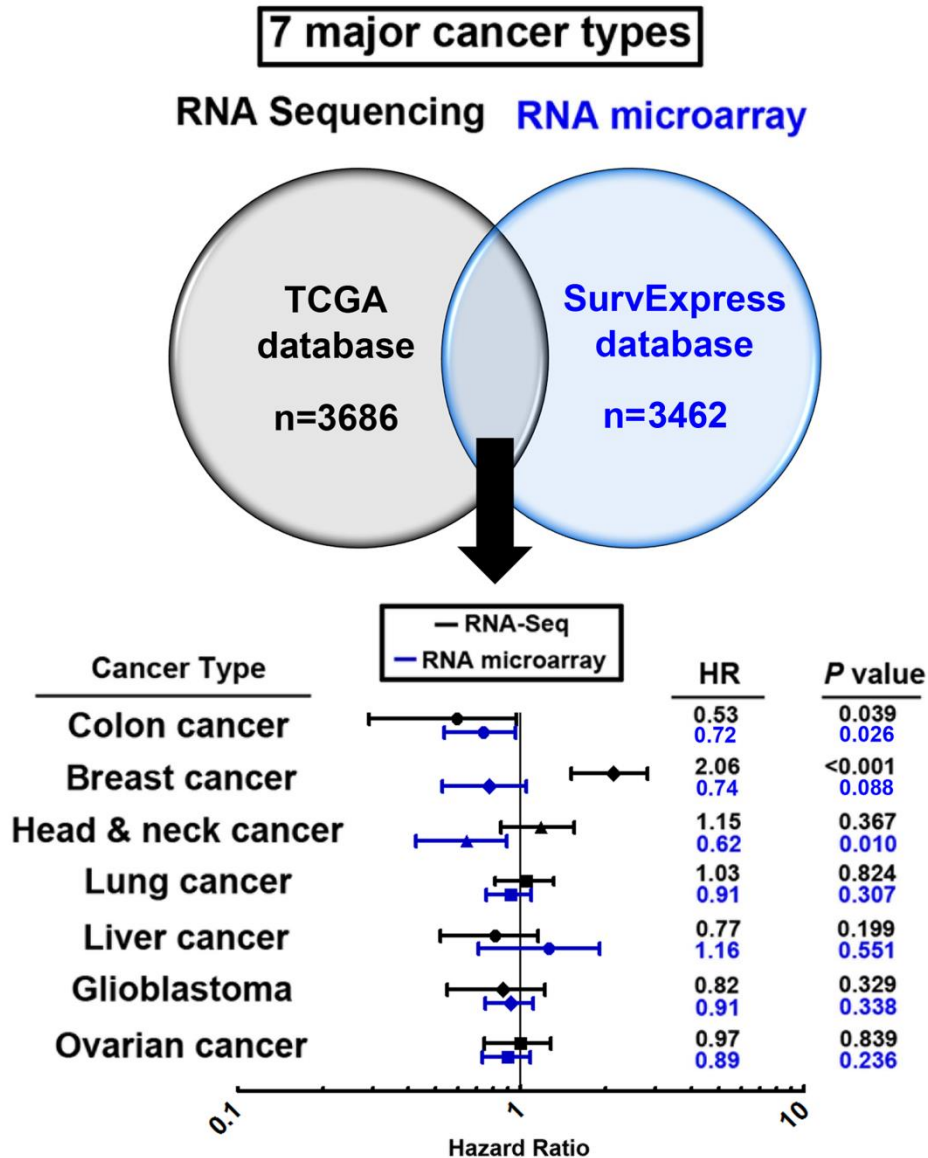

Supplementary Figure 1: Survival analysis of RNA sequencing data from TCGA cohort and RNA microarray results from SurvExpress web resource showed that DDX3 is a significant prognostic predictive indicator in colorectal cancer in both RNA sequencing analysis (hazard ratio [HR] = 0.53,  $P = 0.039$ ) and RNA microarray analysis (HR = 0.72,  $P = 0.026$ ), and patients with low DDX3 expression had poor prognosis. In contrast, high DDX3 RNA level was correlated with prognosis for breast cancer in RNA sequencing analysis (HR = 2.06,  $P < 0.001$ ), but this trend was not seen in RNA microarray analysis. In head and neck cancer, low DDX3 expression level was associated with poor prognosis in RNA microarray analysis (HR = 0.62,  $P = 0.010$ ) but not in RNA sequencing analysis. No association between DDX3 RNA expression and survival were seen in lung cancer, liver cancer, glioblastoma, and ovarian cancer.

## Breast cancer

Overall survival

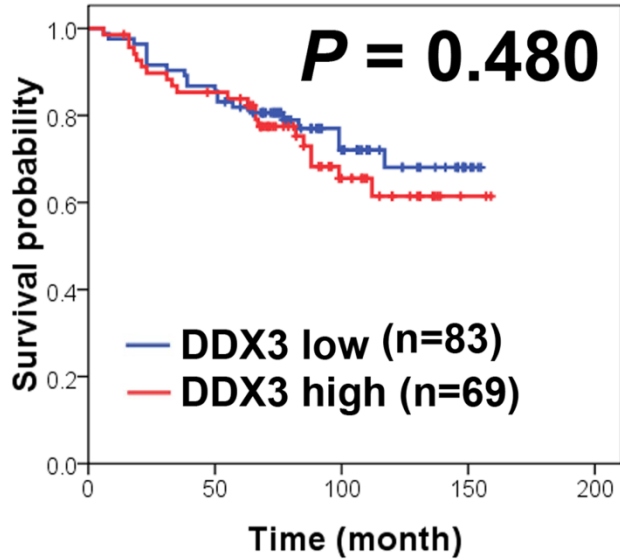

## Head & neck cancer

Overall survival

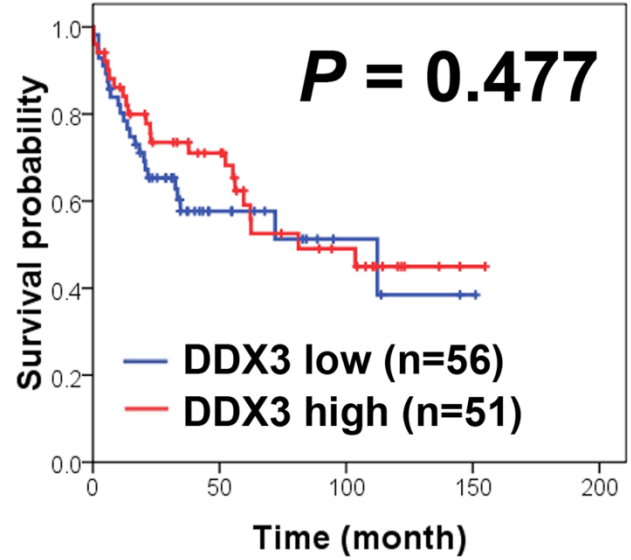

Supplementary Figure 2: Kaplan-Meier plots for high versus low DDX3 protein expression in breast and head and neck cancer. No prognostic significance was seen between DDX3 protein expression and patient outcome in either breast cancer or head and neck cancer.

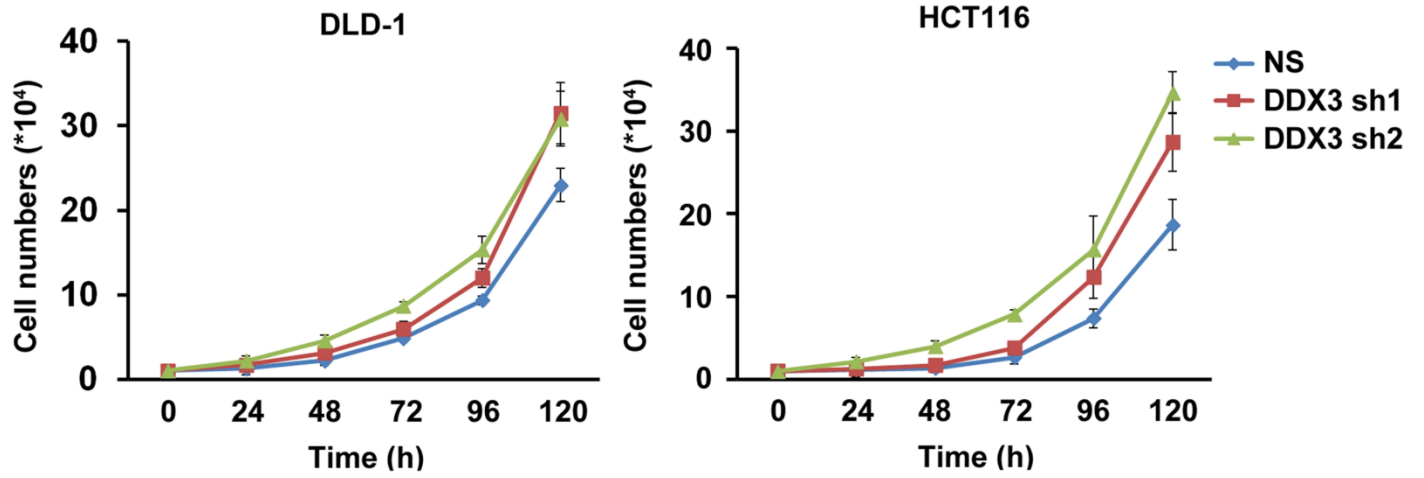

Supplementary Figure 3: In trypan blue exclusion assay, no significant difference was seen between the proliferation activity of DDX3 knockdown group and control group in short-term culture.

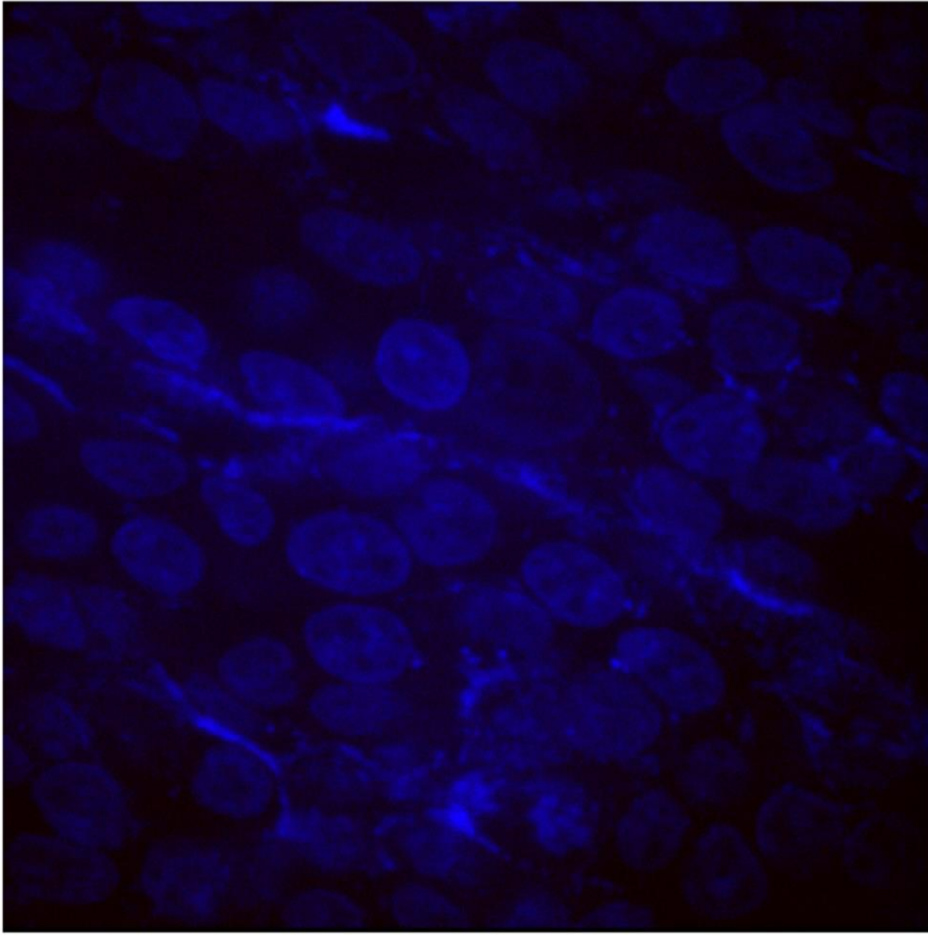

Supplementary Figure 4: Negative control for immunofluorescence staining of E-cadherin on HCT116 non-silenced control cells.

**Supplementary table 1.** Clinicopathological and demographic characteristics of 221 colorectal cancer patients

| Clinicopathological feature | N (%)     |
|-----------------------------|-----------|
| All patients                | 221 (100) |
| Age                         |           |
| <65 y                       | 73 (33)   |
| ≥ 65 y                      | 148 (67)  |
| Gender                      |           |
| Male                        | 127 (57)  |
| Female                      | 94 (43)   |
| Tumor location              |           |
| Cecum                       | 8 (4)     |
| Ascending colon             | 30 (13)   |
| Transverse colon            | 28 (13)   |
| Descending colon            | 18 (8)    |
| Rectosigmoid                | 137 (62)  |
| T stage                     |           |
| T1                          | 9 (4)     |
| T2                          | 19 (9)    |
| T3                          | 160 (72)  |
| T4a                         | 20 (9)    |
| T4b                         | 13 (6)    |
| N stage                     |           |
| N0                          | 100 (45)  |
| N1a                         | 36 (16)   |
| N1b                         | 30 (14)   |
| N1c                         | 2 (1)     |
| N2a                         | 28 (13)   |
| N2b                         | 25 (11)   |
| M stage                     |           |
| M0                          | 181 (82)  |
| M1                          | 40 (18)   |
| Vascular invasion           |           |
| No                          | 101 (46)  |
| Yes                         | 120 (54)  |
| Perineural invasion         |           |
| No                          | 170 (77)  |
| Yes                         | 51 (23)   |
| Tumor histology             |           |
| Nonmucinous                 | 202 (91)  |
| Mucinous                    | 19 (9)    |
| Recurrence                  |           |
| No                          | 141 (64)  |
| Yes                         | 80 (36)   |

**Supplementary table 2.** Clinicopathological and demographic characteristics of 152 breast cancer patients

| Clinicopathological feature | N (%)     |
|-----------------------------|-----------|
| All patients                | 152 (100) |
| Age                         |           |
| <50 y                       | 71 (47)   |
| ≥ 50 y                      | 81 (53)   |
| Surgical type               |           |
| Modified radical mastectomy | 59 (39)   |
| Partial mastectomy          | 93 (61)   |
| ER status                   |           |
| Positive                    | 87 (57)   |
| Negative                    | 65 (43)   |
| PR status                   |           |
| Positive                    | 69 (45)   |
| Negative                    | 83 (55)   |
| HER2 status                 |           |
| Positive                    | 45 (30)   |
| Negative                    | 107 (70)  |
| Recurrence                  |           |
| No                          | 111 (73)  |
| Yes                         | 41 (27)   |

**Supplementary table 3.** Clinicopathological and demographic characteristics of 107 head and neck cancer patients

| Clinicopathological feature | N (%)     |
|-----------------------------|-----------|
| All patients                | 107 (100) |
| Age                         |           |
| <50 y                       | 53 (50)   |
| ≥65 y                       | 54 (50)   |
| Gender                      |           |
| Male                        | 99 (93)   |
| Female                      | 8 (7)     |
| Tumor location              |           |
| Buccal mucosa               | 48 (45)   |
| Tongue                      | 34 (32)   |
| Gingiva                     | 16 (15)   |
| Lip                         | 3 (3)     |
| Others                      | 6 (5)     |
| Pathological stage          |           |
| I                           | 33 (31)   |
| II                          | 21 (20)   |
| III                         | 11 (10)   |
| IV                          | 42 (39)   |
| Lymphovascular invasion     |           |
| Positive                    | 36 (34)   |
| Negative                    | 71 (66)   |
| Perineural invasion         |           |
| Positive                    | 56 (52)   |
| Negative                    | 51 (48)   |
| Recurrence                  |           |
| No                          | 43 (40)   |
| Yes                         | 64 (60)   |

**Supplementary Table 4.**

Univariate and multivariate analysis of DDX3 expression and clinicopathological parameters in colorectal cancer patients

| Variables           | Overall survival    |          |          |                       |        |          | Recurrence-free survival |        |          |                       |        |          |
|---------------------|---------------------|----------|----------|-----------------------|--------|----------|--------------------------|--------|----------|-----------------------|--------|----------|
|                     | Univariate analysis |          |          | Multivariate analysis |        |          | Univariate analysis      |        |          | Multivariate analysis |        |          |
|                     | HR                  | 95% CI   | <i>P</i> | HR                    | 95% CI | <i>P</i> | HR                       | 95%CI  | <i>P</i> | HR                    | 95%CI  | <i>P</i> |
| T stage             |                     |          |          |                       |        |          |                          |        |          |                       |        |          |
| T1+2                | 1                   | 1.191-5. | 0.015    | 1                     | 0.910- | 0.087    | 1                        | 1.401- | 0.006    | 1                     | 0.951- | 0.065    |
| T3+4                | 2.441               | 006      |          | 1.907                 | 3.998  |          | 3.191                    | 7.268  |          | 2.213                 | 5.149  |          |
| N stage             |                     |          |          |                       |        |          |                          |        |          |                       |        |          |
| N0                  | 1                   | 0.948-1. | 0.094    | 1                     | 0.905- | 0.145    | 1                        | 1.060- | 0.024    | 1                     | 0.954- | 0.083    |
| N1-2                | 1.367               | 969      |          | 1.338                 | 1.979  |          | 1.554                    | 2.278  |          | 1.431                 | 2.148  |          |
| M stage             |                     |          |          |                       |        |          |                          |        |          |                       |        |          |
| M0                  | 1                   | 4.233-9. | <0.001   | 1                     | 3.880- | <0.001   | 1                        | 4.088- | <0.001   | 1                     | 3.245- | <0.001   |
| M1                  | 6.442               | 802      |          | 6.278                 | 10.160 |          | 6.197                    | 9.392  |          | 5.228                 | 8.423  |          |
| Vascular invasion   |                     |          |          |                       |        |          |                          |        |          |                       |        |          |
| No                  | 1                   | 0.973-2. | 0.070    | 1                     | 0.424- | 0.087    | 1                        | 1.168- | 0.006    | 1                     | 0.466- | 0.246    |
| Yes                 | 1.404               | 027      |          | 0.671                 | 1.060  |          | 1.722                    | 2.540  |          | 0.753                 | 1.216  |          |
| Perineural invasion |                     |          |          |                       |        |          |                          |        |          |                       |        |          |
| No                  | 1                   | 1.085-2. | 0.018    | 1                     | 0.732- | 0.554    | 1                        | 1.339- | 0.001    | 1                     | 0.865- | 0.186    |
| Yes                 | 1.621               | 422      |          | 1.145                 | 1.792  |          | 1.998                    | 2.979  |          | 1.353                 | 2.116  |          |
| DDX3 expression     |                     |          |          |                       |        |          |                          |        |          |                       |        |          |
| High                | 1                   | 1.547-3. | <0.001   | 1                     | 1.319- | 0.001    | 1                        | 1.677- | <0.001   | 1                     | 1.417- | <0.001   |
| Low                 | 2.222               | 190      |          | 1.915                 | 2.778  |          | 2.443                    | 3.560  |          | 2.095                 | 3.096  |          |

OS: overall survival; RFS: recurrence-free survival; HR: hazard ratio; CI: confidence interval



**Supplementary Table 5.** Correlation of clinicopathological features and DDX3

protein expression in colorectal cancer patients

| Clinicopathological feature | n   | DDX3 expression, n (%) |                 | <i>P</i> |
|-----------------------------|-----|------------------------|-----------------|----------|
|                             |     | Low<br>(n=88)          | High<br>(n=133) |          |
| Age                         |     |                        |                 |          |
| <65 y                       | 73  | 28 (38.4)              | 45 (61.6)       | 0.755    |
| ≥ 65 y                      | 148 | 60 (40.5)              | 88 (59.5)       |          |
| Gender                      |     |                        |                 |          |
| Male                        | 127 | 51 (40.2)              | 76 (59.8)       | 0.905    |
| Female                      | 94  | 37 (39.4)              | 57 (60.6)       |          |
| T stage                     |     |                        |                 |          |
| T1+T2                       | 28  | 7 (25.0)               | 21 (75.0)       | 0.087    |
| T3+T4                       | 193 | 81 (42.0)              | 112 (58.0)      |          |
| N stage                     |     |                        |                 |          |
| N0                          | 100 | 36 (36.0)              | 64 (64.0)       | 0.292    |
| N1+N2                       | 121 | 52 (43.0)              | 69 (57.0)       |          |
| M stage                     |     |                        |                 |          |
| M0                          | 181 | 64 (35.4)              | 117 (64.6)      | 0.004    |
| M1                          | 40  | 24 (60.0)              | 16 (40.0)       |          |
| Vascular invasion           |     |                        |                 |          |
| No                          | 101 | 35 (34.7)              | 66 (65.3)       | 0.150    |
| Yes                         | 120 | 53 (44.2)              | 67 (55.8)       |          |
| Perineural invasion         |     |                        |                 |          |
| No                          | 170 | 66 (38.8)              | 104 (61.2)      | 0.581    |
| Yes                         | 51  | 22 (43.1)              | 29 (56.9)       |          |
| Tumor histology             |     |                        |                 |          |
| Nonmucinous                 | 202 | 76 (37.6)              | 126 (62.4)      | 0.030    |
| Mucinous                    | 19  | 12 (63.2)              | 7 (36.8)        |          |
| Recurrence                  |     |                        |                 |          |
| No                          | 141 | 41 (29.1)              | 100 (70.9)      | <0.001   |
| Yes                         | 80  | 47 (58.8)              | 33 (41.3)       |          |
